# Supplementary material for: Probing the role of intercalating protein sidechains for kink formation in DNA
Source: PubMed Central journal article supplement (PMC5809078; doi:10.1371/journal.pone.0192605), 2018-02-12
Supplement: pone.0192605.s001.pdf [file pone.0192605.s001.pdf]

|                 |                                                                                                |
|-----------------|------------------------------------------------------------------------------------------------|
| CAP/CRP         | 1cgp, 1j59, 1lb2, 1o3q, 1o3r, 1o3s, 1o3t, 1run, 1ruo, 1zrc, 1zrd, 1zre, 1zrf, 2cgp, 3mzh, 3n4m |
| CBC             | 4g92                                                                                           |
| CcpA            | 3oqm, 3oqn, 3oqo, 1rzt                                                                         |
| Cren7           | 3kxt, 3lwh, 3lwi,                                                                              |
| cre-recombinase | 1nzb, 1q3u, 2hof, 2hoi, 3c28, 3c29, 4crx ,5crx                                                 |
| EcoRV           | 1az0, 1b94, 1b95, 1b96, 1b97, 1bgb, 1bss, 1eoo, 1eop, 1rv5, 1rva, 1rvb, 1suz, 1sx8, 2b0d, 2ge5 |
| Hbb             | 2np2                                                                                           |
| HmgD            | 1qrv                                                                                           |
| Lac             | 1efa, 1jwl, 1lbg                                                                               |
| NF-gamma        | 4awl                                                                                           |
| Sac7d           | 1azp, 1azq, 1bnz, 1ca5, 1wd0                                                                   |
| Sox             | 1gt0, 3f27, 3u2b, 4euw                                                                         |
| TBP             | 1c9b, 1cdw, 1jfi, 1nvp, 1tgh, 1vol, 4roc, 4rod, 4roe                                           |
| TFAM            | 3tmm, 3tq6, 4nnu, 4nod                                                                         |
| Topoisomerase   | 3foe, 3fof, 3k9f, 3ksa, 3ksb, 3ltn, 3rad, 3rae, 3raf, 4koe, 4kpe, 4kpf                         |
